# Supplementary material for: Silver(I) metal-organic framework-embedded polylactic acid electrospun fibrous membranes for efficient inhibition of bacteria.
Source: Royal Society of Chemistry journal article supplement (doi:10.1039/d1dt04234c), 2022-05-03
Supplement: d1dt04234c1.pdf [file d1dt04234c1.pdf]

**Electronic Supplementary Information for**

**Silver (I) metal-organic framework-embedded  
polylactic acid electrospun fibrous membranes for  
efficient inhibition of bacteria**

Siqi Zhang <sup>a</sup>, Xiao Ma <sup>a</sup>, Hailong Yu <sup>a</sup>, Xinyi Lu <sup>a, b</sup>, Jianhui Liu <sup>b</sup>, Lihua Zhang <sup>b</sup>,  
Guangyao Wang <sup>a</sup>, Junwei Ye <sup>\*, a</sup>, Guiling Ning <sup>\*, a</sup>

<sup>a</sup> State Key Laboratory of Fine Chemicals, School of Chemical Engineering, Dalian University of Technology, 2 Linggong Road, Dalian, Liaoning, 116024, PR China

<sup>b</sup> CAS Key Laboratory of Separation Sciences for Analytical Chemistry, Dalian Institute of Chemical Physics, Chinese Academy of Sciences, Dalian 116023, PR China

**\*Corresponding author**

Email Address: junweiye@dlut.edu.cn (J. W. Ye), ninggl@dlut.edu.cn (G. L. Ning).

## ***1. Experiment section***

### ***1.1. Proteomics analysis***

Proteomic analysis was carried out according to a previous reported literature. <sup>1</sup>

#### ***1.1.1 Proteome sample preparation***

The proteins were extracted by the lysis buffer containing 1% (v/v) protease inhibitor cocktail in 8 M urea. The extracted proteins were then sonicated using Bioruptor Pico Ultrasonicator (Diagenode). Dithiothreitol (DTT) were added to reduce disulfide bonds and the proteins were incubated at 56°C for 1 h. Iodoacetamide (IAA) were added for protein alkylation and incubated for 30 min in darkness. Phosphate buffer (PB, pH 8.0, 50 mM) were further added to dilute the solution to 1 M urea. Proteins were digested by trypsin with the ratio of 1:50 enzyme/protein at 37 °C overnight.

#### ***1.1.2 LC–MS/MS analysis***

Peptides were separated on a 15 cm reversed phase column (packed in-house with ReproSil-Pur C18-AQ 1.9 µm [Dr. Maisch GmbH]) on an ultra-HPLC EASY-nLC 1000 system (Thermo Fisher Scientific). Separation gradient was 5–22% B (0.1–110.1 min), 22–35% B (110.1–135.1 min), 35–80% B (135.1–135.2 min) with buffer A (98% H<sub>2</sub>O, 2% ACN, 0.1% FA) and buffer B (2% H<sub>2</sub>O, 98% ACN, 0.1% FA). The data were acquired on a Q Exactive mass spectrometer (Thermo Fisher Scientific) in a data-dependent mode. Full scan was acquired in the Orbitrap at a resolution of 70 000 from 300 to 1800 m/z and an AGC target was  $1 \times 10^6$  within a maximum injection time of 50 ms. Ions were sequentially isolated by quadrupole using a 2.0 m/z isolation window to a target value of  $1 \times 10^5$  and a maximum injection time 100 ms. Then they were fragmented by HCD (normalized collision energy of 28%) and detected by Orbitrap at 17 500 resolution. Loop count was 20. The exclusion duration was 45s.

### ***1.1.3 Data processing***

All raw files were analyzed together by Andromeda for database search in the MaxQuant environment v.1.6.1.0. MS/MS spectra were searched against the *E. coli* protein database (UniProt Proteome, release 2018\_07). Enzyme specificity was set to trypsin with up to two missed cleavages. Carbamidomethylation (C) (+57.021 Da) was set as fixed modification. Oxidation (M) (+15.995 Da) and acetylation (protein N-termini) (+42.011 Da) were set as variable modifications. The mass tolerances were 10 ppm for the precursor ions and 20 ppm for the fragment ions. We used ‘match between runs’ in the time window of 2 min. The quantification results were based on the intensities of label free quantification method.

### ***1.2. Statistical analysis***

All the quantitative data in this paper were shown as means  $\pm$  standard deviations with n=3. The statistical analysis was performed using Origin 2021 software. Comparisons between groups were analyzed by one-way analysis of variance (ANOVA).

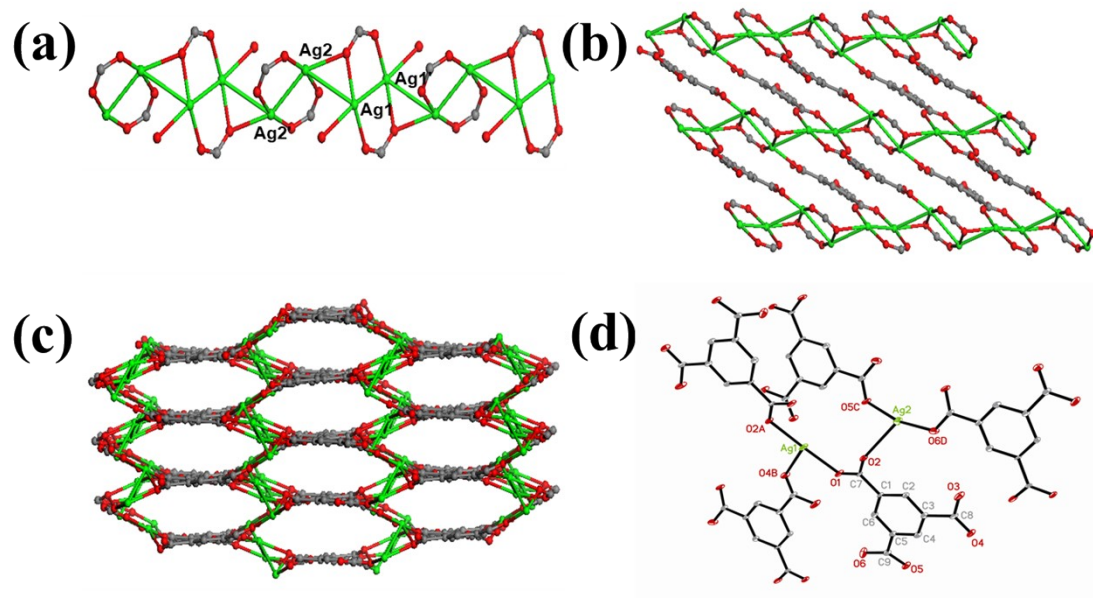

**Fig. S1** View of the (a) rod-shaped building blocks, (b) layers, (c) 3-D frameworks of  $\text{Ag}_2(\text{HBTC})$ , (d) perspective view of the coordination environment of the  $\text{Ag}(\text{I})$  centers in  $\text{Ag}_2(\text{HBTC})$  with atoms represented by 30% thermal ellipsoids.

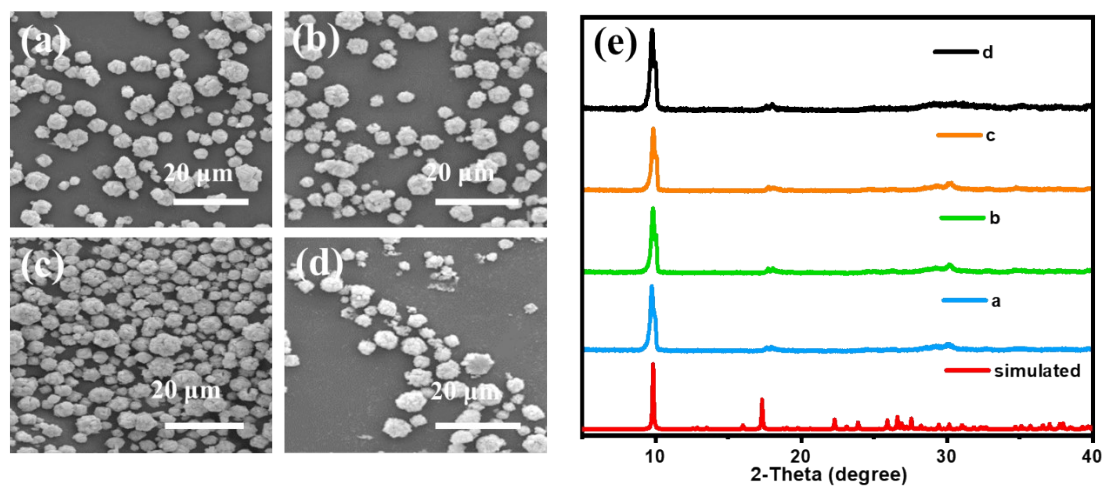

**Fig. S2** SEM images of nanoscale  $\text{Ag}_2(\text{HBTC})$  synthesized through emulsion-templating method at (a) 120 °C for 0.5 h, (b) 120 °C for 1.0 h, (c) 160 °C for 0.5 h and (d) 160 °C for 1.0 h. (e) XRD patterns for the simulated and synthesized  $\text{Ag}_2(\text{HBTC})$  in Figure S2a-d.

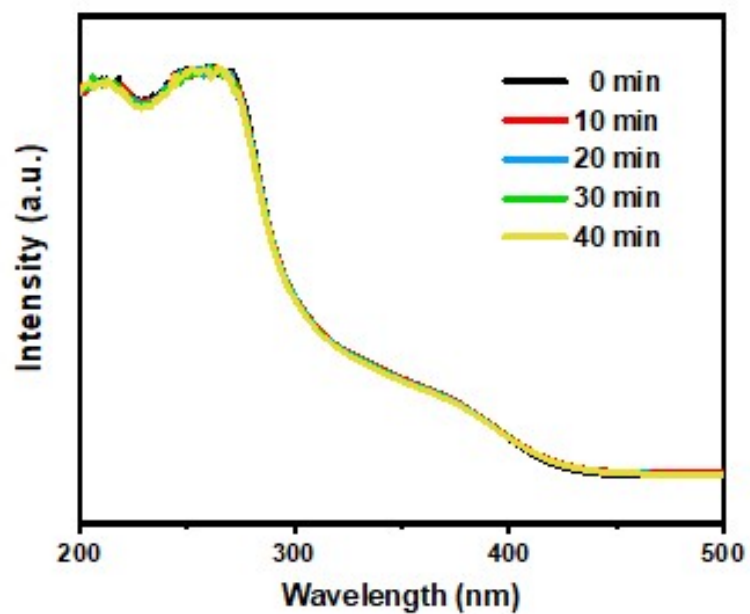

**Fig. S3** Time-dependent UV-vis spectra of NBT under Xenon lamp irradiation.

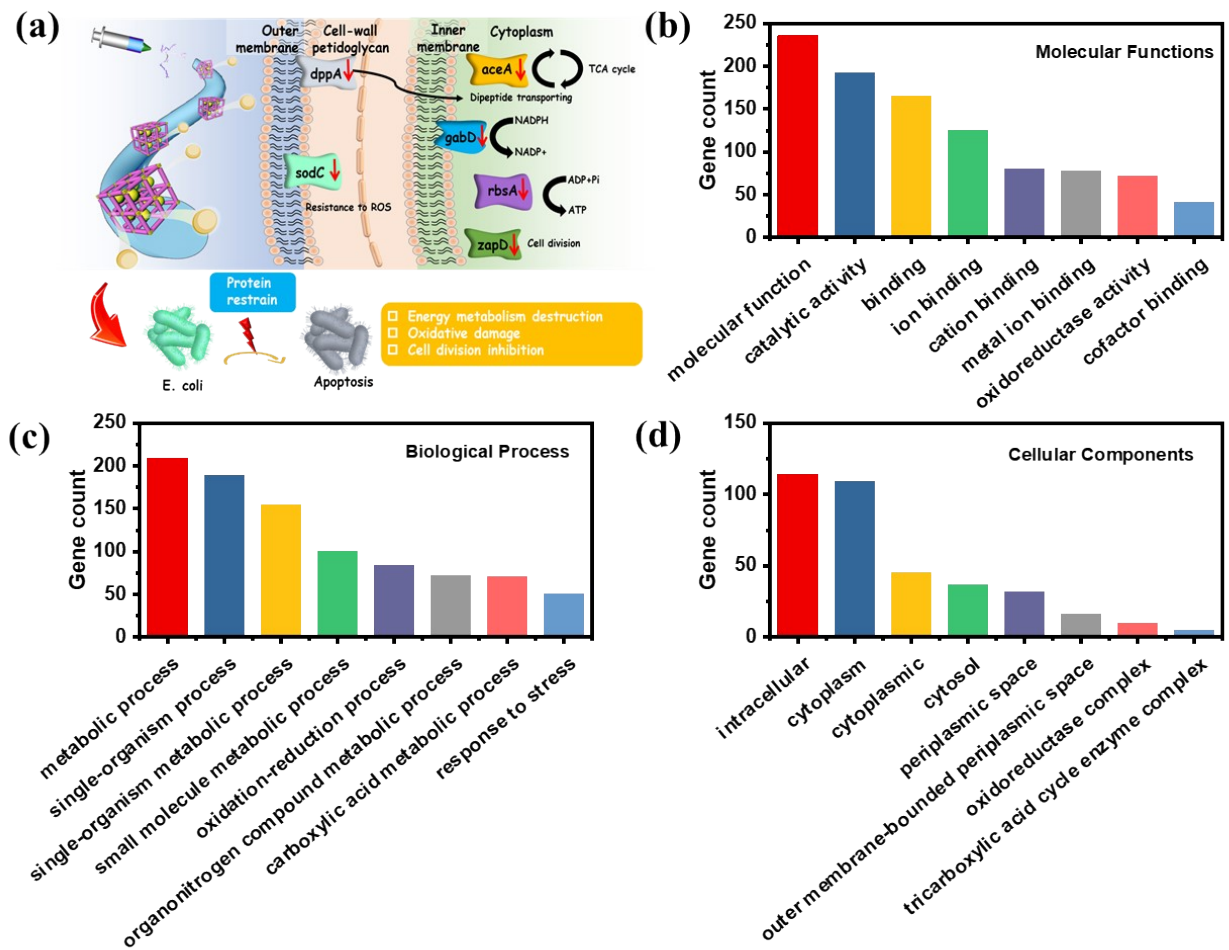

**Fig. S4** (a) Schematic of the potential antibacterial mechanism concluded from the proteomic analysis. The differentially expressed proteins classified using Gene Ontology annotation into (b) molecular functions, (c) biological process and (d) cellular components.

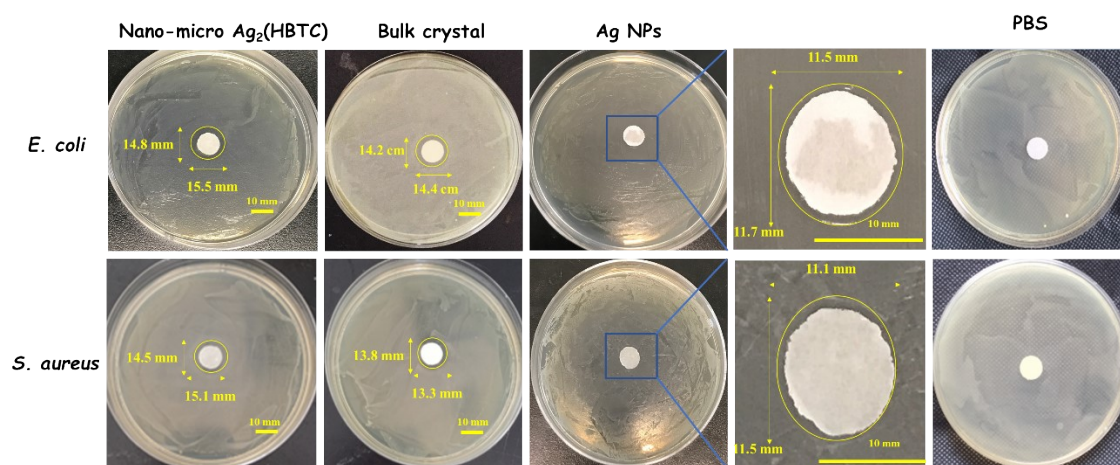

**Fig. S5** Optical images of inhibition zone treated with nano-micro scale Ag<sub>2</sub>(HBTC), bulk crystal, Ag NPs and PBS against *E. coli* and *S. aureus*.



**Table S1.** Selected bond lengths [ $\text{\AA}$ ] for  $\text{Ag}_2(\text{HBTC})$ 

| <b>[Ag<sub>2</sub>(HBTC)]</b>                                                                                                                                      |            |                           |            |
|--------------------------------------------------------------------------------------------------------------------------------------------------------------------|------------|---------------------------|------------|
| Ag(1)-O(1)                                                                                                                                                         | 2.233(4)   | Ag(1)-O(2) <sup>#1</sup>  | 2.244(4)   |
| Ag(1)-O(4) <sup>#2</sup>                                                                                                                                           | 2.546(4)   | Ag(1)-Ag(1) <sup>#1</sup> | 2.8622(10) |
| Ag(1)-Ag(2) <sup>#1</sup>                                                                                                                                          | 3.2276(8)  | Ag(2)-O(6) <sup>#3</sup>  | 2.127(5)   |
| Ag(2)-O(5) <sup>#4</sup>                                                                                                                                           | 2.170(4)   | Ag(2)-O(2)                | 2.537(5)   |
| Ag(2)-Ag(2) <sup>#5</sup>                                                                                                                                          | 2.8184(11) | Ag(2)-Ag(1) <sup>#1</sup> | 3.2276(8)  |
| Symmetry transformations used to generate equivalent atoms: #1 -x+1, -y, -z+1, #2 x+1, -y+1/2, z+1/2, #3 x-1, -y+1/2, z-1/2, #4 -x+1, y-1/2, -z+1/2, #5 -x, -y, -z |            |                           |            |

**Table S2.** Selected bond angles [°] for Ag<sub>2</sub>(HBTC)

| [Ag <sub>2</sub> (HBTC)]                                                                                                                                           |            |                                                |            |
|--------------------------------------------------------------------------------------------------------------------------------------------------------------------|------------|------------------------------------------------|------------|
| O(1)-Ag(1)-O(2) <sup>#1</sup>                                                                                                                                      | 161.41(16) | O(6) <sup>#3</sup> -Ag(2)-O(5) <sup>#4</sup>   | 164.57(19) |
| O(1)-Ag(1)-O(4) <sup>#2</sup>                                                                                                                                      | 86.15(15)  | O(6) <sup>#3</sup> -Ag(2)-O(2)                 | 113.58(17) |
| O(2) <sup>#1</sup> -Ag(1)-O(4) <sup>#2</sup>                                                                                                                       | 108.28(15) | O(5) <sup>#4</sup> -Ag(2)-O(2)                 | 81.29(16)  |
| O(1)-Ag(1)-Ag(1) <sup>#1</sup>                                                                                                                                     | 79.63(11)  | O(6) <sup>#3</sup> -Ag(2)-Ag(2) <sup>#5</sup>  | 84.70(13)  |
| O(2) <sup>#1</sup> -Ag(1)-Ag(1) <sup>#1</sup>                                                                                                                      | 83.38(10)  | O(5) <sup>#4</sup> -Ag(2)-Ag(2) <sup>#5</sup>  | 79.90(12)  |
| O(4) <sup>#2</sup> -Ag(1)-Ag(1) <sup>#1</sup>                                                                                                                      | 160.16(11) | O(2)-Ag(2)-Ag(2) <sup>#5</sup>                 | 153.66(10) |
| O(1)-Ag(1)-Ag(2) <sup>#1</sup>                                                                                                                                     | 131.90(13) | O(6) <sup>#3</sup> -Ag(2)-Ag(1) <sup>#1</sup>  | 131.74(18) |
| O(2) <sup>#1</sup> -Ag(1)-Ag(2) <sup>#1</sup>                                                                                                                      | 51.50(12)  | O(5) <sup>#4</sup> -Ag(2)-Ag(1) <sup>#1</sup>  | 56.22(14)  |
| O(4) <sup>#2</sup> -Ag(1)-Ag(2) <sup>#1</sup>                                                                                                                      | 63.92(12)  | O(2)-Ag(2)-Ag(1) <sup>#1</sup>                 | 43.80(10)  |
| Ag(1) <sup>#1</sup> -Ag(1)-Ag(2) <sup>#1</sup>                                                                                                                     | 116.78(3)  | Ag(2) <sup>#5</sup> -Ag(2)-Ag(1) <sup>#1</sup> | 109.92(3)  |
| Symmetry transformations used to generate equivalent atoms: #1 -x+1, -y, -z+1, #2 x+1, -y+1/2, z+1/2, #3 x-1, -y+1/2, z-1/2, #4 -x+1, y-1/2, -z+1/2, #5 -x, -y, -z |            |                                                |            |

**Table S3.** Crystallographic Data and Structure Refinements for Ag<sub>2</sub>(HBTC)

| <b>Ag<sub>2</sub>(HBTC)</b>            |                                                              |
|----------------------------------------|--------------------------------------------------------------|
| Empirical formula                      | C <sub>9</sub> H <sub>4</sub> O <sub>6</sub> Ag <sub>2</sub> |
| Formula weight                         | 423.86                                                       |
| Crystal system                         | Monoclinic                                                   |
| Space group                            | <i>P21/c</i>                                                 |
| a (Å)                                  | 7.0523(4)                                                    |
| b (Å)                                  | 17.9550(11)                                                  |
| c (Å)                                  | 7.4629(5)                                                    |
| β (°)                                  | 94.820(2)                                                    |
| Volume (Å <sup>3</sup> )               | 941.64(10)                                                   |
| Z                                      | 4                                                            |
| D <sub>calc</sub> (mg/m <sup>3</sup> ) | 2.990                                                        |
| μ (mm <sup>-1</sup> )                  | 4.172                                                        |
| F(000)                                 | 800                                                          |
| R <sub>int</sub>                       | 0.1930                                                       |
| GOF on F <sup>2</sup>                  | 1.161                                                        |
| R <sub>1</sub> [I>2σ(I)]*              | 0.0551                                                       |
| wR <sub>2</sub> [I>2σ(I)]*             | 0.1352                                                       |
| R <sub>1</sub> (all data) *            | 0.0569                                                       |
| wR <sub>2</sub> (all data)*            | 0.1366                                                       |

---

\* $R_1 = \frac{\sum ||F_o| - |F_c||}{\sum |F_o|}$ ;  $wR_2 = \{\frac{\sum [w(F_o^2 - F_c^2)^2]}{\sum [w(F_o^2)]^2}\}^{1/2}$

---

**Table S4.** Antibacterial properties of MOFs based composites.

| Materials                             | Synthesis approach                                   | Bacteria strains                     | Antibacterial efficiency                                                                                                                     | Experimental methods                                                                                                               | Mechanism Investigation                                                     | Reference |
|---------------------------------------|------------------------------------------------------|--------------------------------------|----------------------------------------------------------------------------------------------------------------------------------------------|------------------------------------------------------------------------------------------------------------------------------------|-----------------------------------------------------------------------------|-----------|
| Ag-MOF/polyamide                      | In-situ growth                                       | <i>E. coli</i>                       | 76.3%                                                                                                                                        | Heterotrophic plate count experiments; Confocal microscopy test; SEM observation                                                   | Ag <sup>+</sup> releasing                                                   | 2         |
| Cu-MOF/cotton                         | Post synthetic modification                          | <i>E. coli</i>                       | ≥4-log reduction (24 h)                                                                                                                      | Cellular viability                                                                                                                 | Cu <sup>2+</sup> releasing                                                  | 3         |
| ZIF-8@hydrogel                        | Microfluidic-emulsion-templating method              | <i>E. coli</i>                       | 99.3% (ZIF-8>500 μg/mL)                                                                                                                      | Colony counting method                                                                                                             | Zinc ion release test                                                       | 4         |
| Ag-MOFs@CNF@CF                        | In situ green deposition method                      | <i>E. coli</i>                       | Inhibition zone 18.1 mm                                                                                                                      | Inhibition zone test                                                                                                               | ---                                                                         | 5         |
| MOF-Embedded Hydrogels                | UV light-mediated thiol-ene photopolymerization      | <i>E. coli</i><br><i>S. aureus</i>   | MBC hydrogel@Cu-MOF 1 and hydrogel@Co-MOF 2: 99.9% hydrogel@Zn-MOF 3 :0%                                                                     | Colony counting method                                                                                                             | Metal ion release test                                                      | 6         |
| Cu-MOF-1/PLA                          | Electrospinning                                      | <i>E. coli</i><br><i>S. aureus</i>   | <i>E. coli</i> : 99.4%<br><i>S. aureus</i> : 99.6%                                                                                           | Growth curve; Colony counting method; Fluorescence-based staining assay; Morphological investigation                               | Release of Cu <sup>2+</sup> ions,                                           | 7         |
| Cu-MOF-74/PVDF                        | Coating                                              | <i>E. coli</i>                       | 97.7% (Cu-MOF-74 loading amount: 0.05 g)                                                                                                     | Colony counting method                                                                                                             | Cu <sup>2+</sup> assays; ROS detection                                      | 8         |
| Dimethyl fumarate-loaded-HKUST-1@CMCS | chemically connecting                                | <i>E. coli</i> ,<br><i>S. aureus</i> | Inhibition zone<br><i>E. coli</i> : 12.8 ± 1.4 mm<br><i>S. aureus</i> : 17.4 ± 0.1                                                           | zone inhibition test                                                                                                               | Dimethyl fumarate releasing test; Measurement of Cu(II) level               | 9         |
| LV@UiO-66-NH <sub>2</sub> @PVA        | metal complexation and heat treatment.               | <i>E. coli</i> ,<br><i>S. aureus</i> | higher than 3 log CFU reduction of <i>E. coli</i> and <i>S. aureus</i> at 100 μg/mL.                                                         | Colony counting method<br>Fluorescent-based bacteria live/dead test                                                                | ---                                                                         | 10        |
| Ag <sub>2</sub> (HBTC)/PLA            | Emulsion templating method; one step electrospinning | <i>E. coli</i> ,<br><i>S. aureus</i> | MIC: <i>E. coli</i> 50–100 mg/L<br><i>S. aureus</i> : 100–150 mg/L<br><br>Antibacterial rate: more than 99.9% toward both strains (250 mg/L) | Growth curve, zone of inhibition, Bacterial reduction assay, Morphology investigation<br>Fluorescent-based bacteria live/dead test | Ag <sup>+</sup> releasing; superoxide species detection; proteomic analysis | This work |

## References

1. S. Zhang, J. Ye, Y. Sun, J. Kang, J. Liu, Y. Wang, Y. Li, L. Zhang and G. Ning, *Chem. Eng. J.*, 2020, **390**, 124523.
2. M. Pejman, M. D. Firouzjaei, S. A. Aktij, P. Das, E. Zolghadr, H. Jafarian, A. A. Shamsabadi, M. Elliott, M. Sadrzadeh, M. Sangermano, A. Rahimpour and A. Tiraferri, *ACS Appl. Mater. Interfaces*, 2020, **12**, 36287-36300.
3. H. N. Rubin, B. H. Neufeld and M. M. Reynolds, *ACS Appl. Mater. Interfaces*, 2018, **10**, 15189-15199.
4. X. Yao, G. Zhu, P. Zhu, J. Ma, W. Chen, Z. Liu and T. Kong, *Adv. Funct. Mater.*, 2020, **30**, 1909389.
5. S. Ma, M. Zhang, J. Nie, J. Tan, B. Yang and S. Song, *Carbohydr. Polym.*, 2019, **203**, 415-422.
6. K. Gwon, I. Han, S. Lee, Y. Kim and D. N. Lee, *ACS Appl. Mater. Interfaces*, 2020, **12**, 20234-20242.
7. Z. Liu, J. W. Ye, A. Rauf, S. Q. Zhang, G. Y. Wang, S. Q. Shi and G. L. Ning, *Biomater. Sci.*, 2021, **9**, 3851-3859.
8. H. Zheng, D. Wang, X. Sun, S. Jiang, Y. Liu, D. Zhang and L. Zhang, *Chem. Eng. J.*, 2021, **411**, 128524.
9. G. Huang, Y. Li, Z. Qin, Q. Liang, C. Xu and B. Lin, *Carbohydr. Polym.*, 2020, **233**, 115848.
10. J. Zhu, W. Qiu, C. Yao, C. Wang, D. Wu, S. Pradeep, J. Yu and Z. Dai, *J. Colloid Interface Sci.*, 2021, **603**, 243-251.
